# Supplementary material
Source: Springer Nature journal article supplement (https://www.springermedizin.de/resource/supplementary/12959_2012_163_MOESM1_ESM.pdf/9569196)

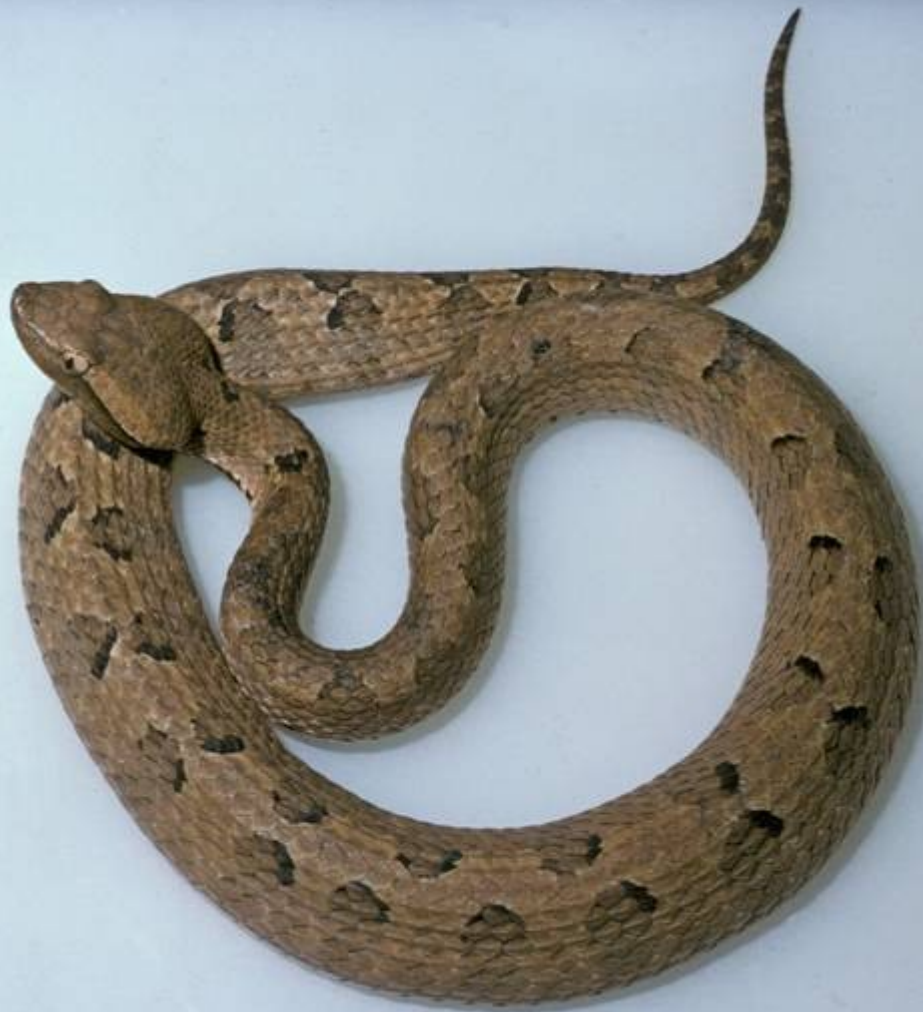

Supplement: MOESM1 [file 9569196]
